# Supplementary material for: Sparganin A alleviates blood stasis syndrome and its key targets by molecular docking
Source: Royal Society of Chemistry journal article supplement (doi:10.1039/c9ra06329c), 2019-01-01

## Supplementary material A

### Certificate of Analysis of Sparganin A (cyclo (Tyr-Leu))

**Product Name:** 04010028241

**Sequence:** cyclo(YL) (Remark:haid-to-tail cyclization)

**Sequence(Three Letters Code):** cyclo(Tyr-Leu) (Remark:haid-to-tail cyclization)

**Purity:** 99.81%

**Molecular Weight:** 276.35

**Solubility:** 1mg/ml in 25%ACN/75%H<sub>2</sub>O

| Test                | Specification                         | Result   |
|---------------------|---------------------------------------|----------|
| <b>Purity:</b>      | HPLC                                  | Conforms |
|                     | (See attached RP-HPLC chromatogram)   |          |
| <b>MS Analysis:</b> | ESI-MS                                | Conforms |
|                     | (See attached MS spectrum)            |          |
| <b>Counter Ion:</b> | Trifluoroacetate                      | Conforms |
| <b>Appearance:</b>  | Lyophilized powder or Crystallization | Conforms |

**Quality Assurance By:** \_\_\_\_\_ **Position:** Manager **Date:** 2018-11-05

**Important:**The peptides can be used for research only. Most of the peptides are lyophilized white or faint yellow powder while fluorescent modified ones have special colors. The state of peptides with strong hydrophilic properties may be crystalline or liquid which does not affect for use. Before experiment, please choose proper solvent for your experiment to dissolve peptides. If peptides cannot be dissolved under harsh conditions, we can carry out feasibility study. Storage conditions:-20°C, seal, avoid light, dry.

**Please test the sample within two weeks after receiving it.**

# HPLC Analysis Report

Measurement: Peak Area Run Time: 20min  
Calculation Type: Percent Wavelength : 220nm  
Flow Rate : 1.0ml/min Inj.Vol: 10uL  
Column: Kromasil 100-5C18,4.6mmX250mm,5 micron Column Temp: 25°C  
Buffer A : 0.1%TFA in Acetonitrile Buffer B: 0.1%TFA in water  
Gradient(linear): A B  
0.0min 18% 82%  
20min 38% 62%  
20.1min 100% 0%

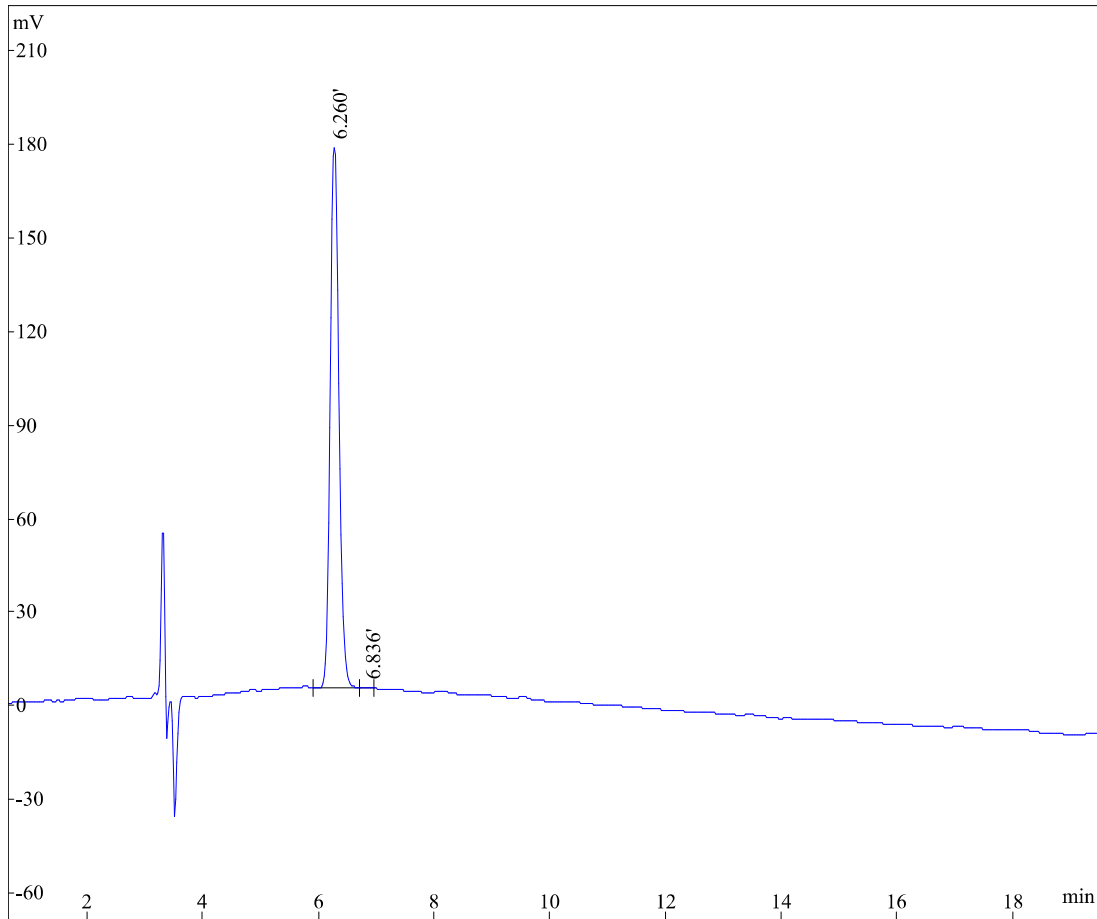

| Rank  | Time  | Name | Conc.  | Area    |
|-------|-------|------|--------|---------|
| 1     | 6.260 |      | 99.81  | 1632454 |
| 2     | 6.836 |      | 0.1886 | 3084    |
| Total |       |      | 100    | 1635538 |

# MS Analysis Report

Ion Source: ESI                      Nebulizer Gas (NEB): 12.00  
Curtain Gas(CUR): 6.00            Ionspray Voltage(IS): ±4500  
Temperature(TEM): 0.00            Run Time: 0.5-1min

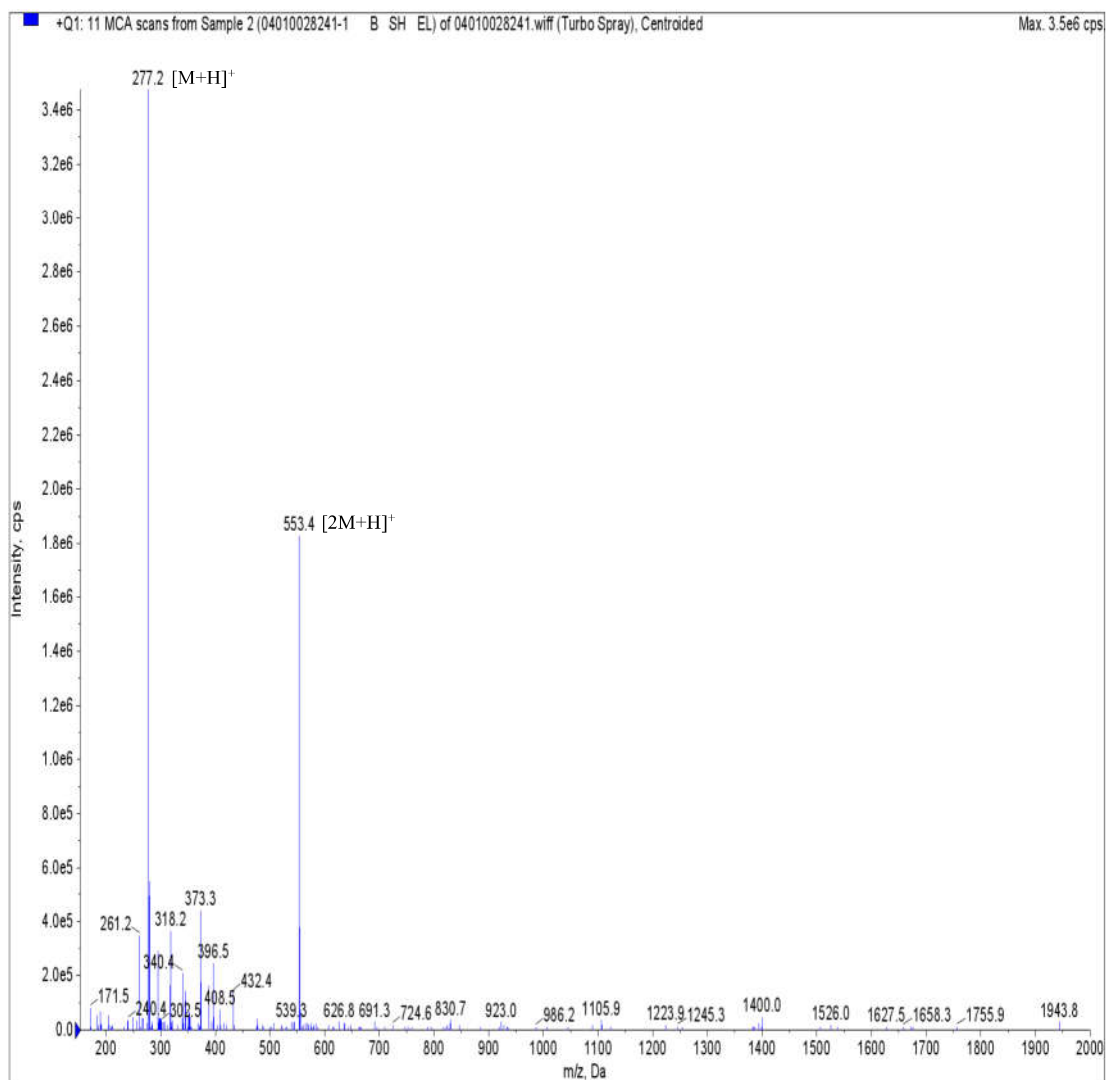

## Supplementary material B

**Table The results of molecular docking score of targets with Sparganin A (cyclo(Tyr-Leu))**

| Gene name | PDB ID | Total score |
|-----------|--------|-------------|
| FLT3      | 6il3   | 7.5293      |
| TNF       | 5yoy   | 7.2241      |
| PTGS2     | 5kir   | 7.1925      |
| SLC23A1   | 5vnn   | 6.9739      |
| KLKB1     | 601S   | 6.9247      |
| CYP2C9    | 5X23   | 6.9195      |
| EPO       | 1eer   | 6.8649      |
| SERPINC1  | 4EB1   | 6.8426      |
| SPP1      | 3cxd   | 6.8083      |
| GUCY1A1   | 4ni2   | 6.8074      |
| SERPINA1  | 5NBU   | 6.8064      |
| ITGB3     | 6BXJ   | 6.7364      |
| CRP       | 4n9h   | 6.6167      |
| NPPB      | 3N56   | 6.5964      |
| P2Y12     | 4NTJ   | 6.5699      |
| GP1BA     | 3p72   | 6.5262      |
| PROC      | 3f6u   | 6.4348      |
| CYP2C19   | 4gqs   | 6.3976      |
| ACE       | 6H5W   | 6.3549      |
| F7        | 5pa8   | 6.3294      |
| F5        | 6cqn   | 6.3015      |
| MMP9      | 6ESM   | 6.2834      |
| COL4A1    | 6MPX   | 6.2226      |
| CSF2      | 6BFQ   | 6.1999      |
| CYP3A5    | 6mjm   | 6.1655      |
| HGF       | 5COE   | 6.1406      |
| AVP       | 2BN2   | 6.1207      |
| FUT4      | 2de0   | 6.0568      |
| UBIAD1    | 4tq3   | 6.0501      |
| IL11      | 4MHL   | 6.0427      |
| AGT       | 6I3F   | 6.0122      |
| PIP4K2A   | 2YBX   | 6.007       |
| F2        | 6BJR   | 5.9687      |
| KDR       | 6GQO   | 5.9395      |
| MERTK     | 5u6c   | 5.9197      |
| OXT       | 2hnu   | 5.865       |
| SERPINE1  | 6I8S   | 5.8438      |
| VEGFA     | 6d3o   | 5.7943      |
| EDNRB     | 6IGK   | 5.771       |
| NQO1      | 6FY4   | 5.7104      |
| ADAMTS13  | 3ghm   | 5.6989      |
| SELP      | 1g1q   | 5.6701      |
| PTGER3    | 6M9T   | 5.6232      |
| FLT1      | 5T89   | 5.5924      |
| REN       | 6I3F   | 5.5343      |
| CASP3     | 6CKZ   | 5.4785      |
| GAS6      | 5vxz   | 5.457       |
| CASP8     | 5H31   | 5.444       |
| FOS       | 1S9K   | 5.4304      |
| HMOX1     | 6EHA   | 5.4048      |
| F10       | 5vof   | 5.3568      |
| GNAQ      | 4ekc   | 5.3101      |
| PF4       | 4RAU   | 5.2821      |
| FGA       | 5cfa   | 5.2782      |
| NOS2      | 5TP6   | 5.2612      |
| PLAT      | 5ZLZ   | 5.2403      |
| PLAU      | 6NMB   | 5.2253      |
| CD2       | 2j7i   | 5.2194      |
| APP       | 6HAR   | 5.2084      |
| ADORA1    | 6D9H   | 5.1831      |
| MMP3      | 4G9L   | 5.1488      |
| ITGAV     | 6DJP   | 4.989       |
| P2RY12    | 4pxz   | 4.9312      |
| KLF4      | 2wbs   | 4.919       |
| LTF       | 2PMS   | 4.8734      |
| MMP2      | 3AYU   | 4.8641      |
| POMC      | 4XNH   | 4.8473      |

|        |      |         |
|--------|------|---------|
| BCL2L1 | 6IJQ | 4. 8461 |
| P2RY1  | 4XNV | 4. 7912 |
| HMOX2  | 5UC8 | 4. 7899 |
| TYR03  | 1rhf | 4. 7412 |
| F9     | 6mv4 | 4. 6438 |
| F3     | 2hft | 4. 5654 |
| APC    | 5Z8H | 4. 3996 |
| S100B  | 5D7F | 4. 395  |
| CNTF   | 1CNT | 4. 378  |
| FCGR2A | 3ry4 | 4. 351  |
| BCL2   | 6GL8 | 4. 2924 |
| VWF    | 6n29 | 4. 2748 |
| BAX    | 6EB6 | 4. 0258 |
| EDN1   | 6DK5 | 3. 986  |
| PDE3A  | 5K1I | 3. 9724 |
| ITGA2B | 2N9Y | 3. 633  |
| SIRT1  | 4ZZH | 3. 6223 |
| FERMT3 | 2ys3 | 3. 4687 |
| VKORC1 | 3kp8 | 3. 2532 |
| THBD   | 5to3 | 3. 218  |
| PROS1  | 1Z6C | 2. 675  |

---

# Supplementary material C

Figure Sparganin A is bound to residues outside the active pocket of targets

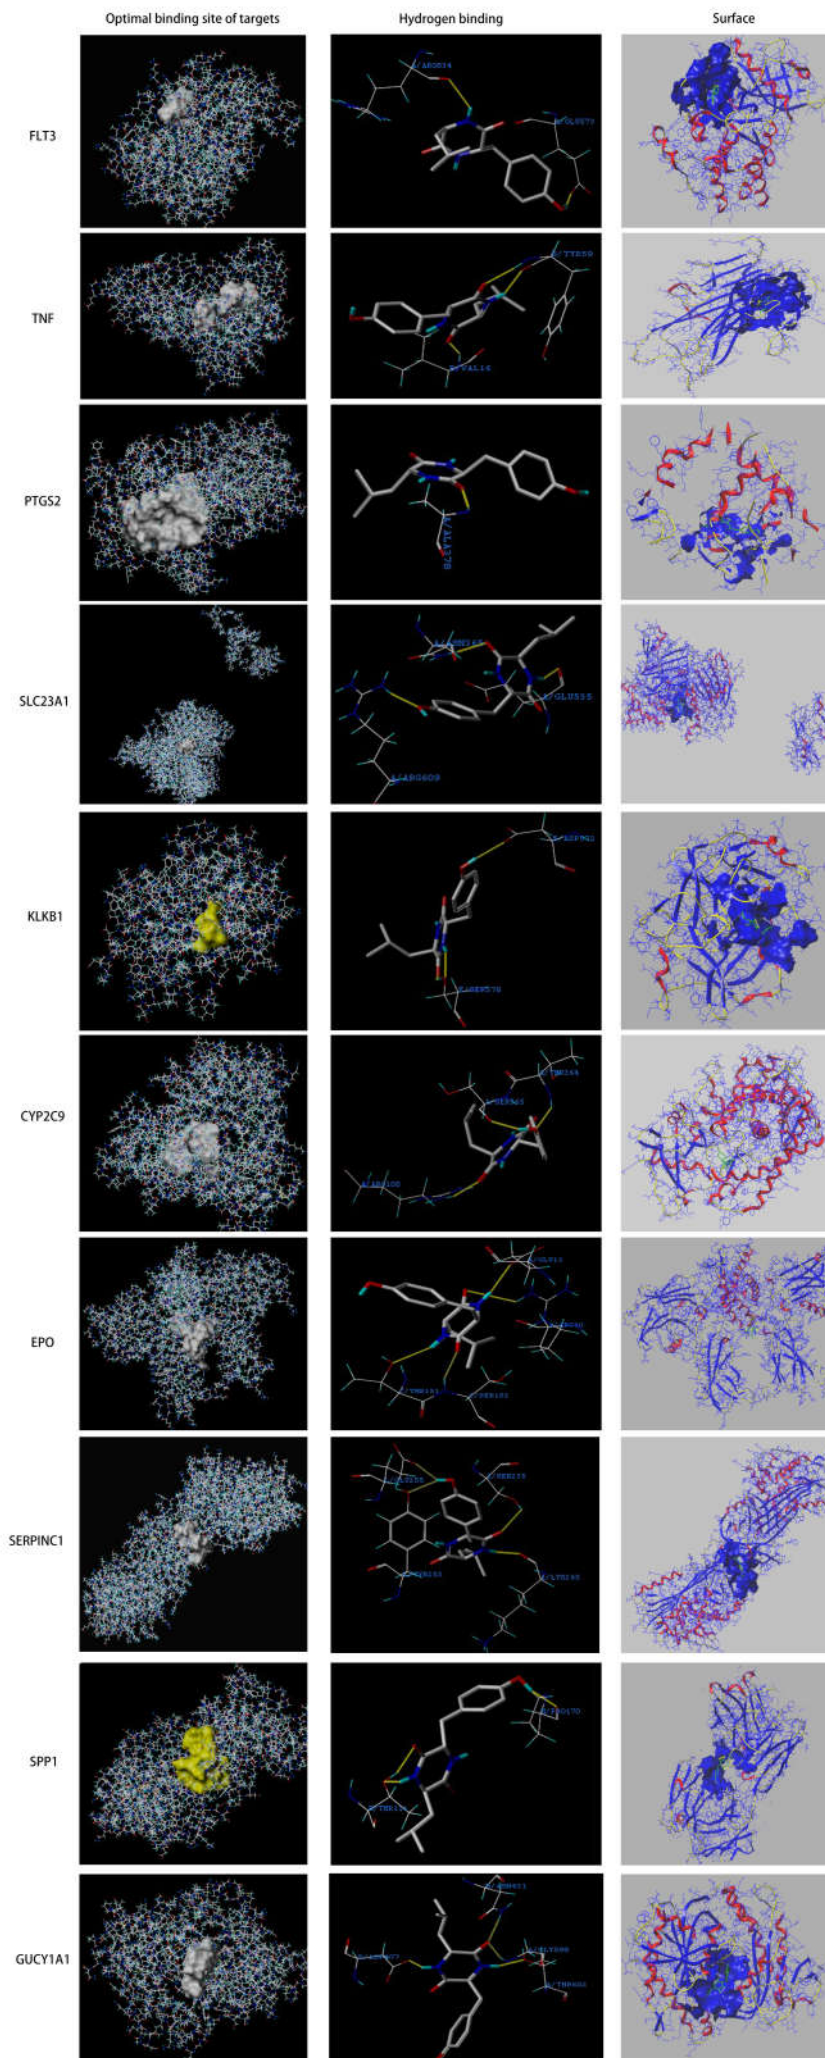

Supplement: c9ra06329c1.pdf [file c9ra06329c1.pdf]
